# Supplementary material for: The whole experience of public hospital physicians from several specialties with biopharmaceutical effectiveness, safety, adverse drug reactions and interchangeability: A qualitative study
Source: PubMed Central journal article supplement — Explor Res Clin Soc Pharm. 2022 Jul 31;7:100162. doi: 10.1016/j.rcsop.2022.100162 (PMC9386114; doi:10.1016/j.rcsop.2022.100162), 2022-07-31
Supplement: mmc1.pdf [file mmc1.pdf]

## Supplementary 1: Reference biological and biosimilar medications approved by the Iraqi Ministry of Health

| Reference medications                               | Company           | Biosimilar medications                        | Company                     | Indicating areas                               |
|-----------------------------------------------------|-------------------|-----------------------------------------------|-----------------------------|------------------------------------------------|
| Adalimumab (Humira)                                 | Abbvie            | Adalimumab (Amgevita)                         | Amgen                       | Rheumatology, Gastroenterology and Hepatology. |
| Aflibercept (Eylea)                                 | Bayer             | N/A                                           |                             | Ophthalmology                                  |
| Agalsidase beta (Fabrazyme)                         | Genzyme           | N/A                                           |                             | Nephrology, Neurology, Gastroenterology        |
| Antithymocyte globulin (Atgam)                      | Pfizer            | N/A                                           |                             | Nephrology                                     |
| Basiliximab (Simulect)                              | NOVARTIS          | N/A                                           |                             | Nephrology                                     |
| Bevacizumab (Avastin)                               | Genentech         | Bevacizumab (Stivant)                         | Aryogen                     | Oncology, ophthalmology                        |
| Bortezomib (Alvocade)                               | Nano Fanavaran    |                                               |                             | Oncology (Hematology)                          |
| Etanercept (Enbrel)                                 | Pfizer            | N/A                                           |                             | Rheumatology, Dermatology                      |
|                                                     |                   | Filgrastim (Zarxio)                           | Sandoz                      | Oncology                                       |
|                                                     |                   | Filgrastim (Nivestim)                         | Hospira                     |                                                |
| Gaisulfate (Naglazym)                               | Biomarin pharma   | N/A                                           |                             | Rheumatology                                   |
| Glucagon (GlucaGen)                                 | Nova Nordisk      | N/A                                           |                             | Endocrinology                                  |
| Heparin (Heparin LEO)                               | LEO Pharma        |                                               |                             | Internal Medicine                              |
| Human Erythropoietin (alfa rh Epo)(recomb) ( Eprex) | Janssen-Cilag     | Human erythropoietin (Alfa RH Epo) (Binocrit) | Sandoz                      | Nephrology                                     |
|                                                     |                   | Epoetin Alfa - epbx (Retacrit)                | Pfizer                      |                                                |
|                                                     |                   | Recombinant human erythropoietin (Koromon)    | HANKOOK KORUS Pharm CO. LTD |                                                |
| Human Coagulation Factor VIII (Haemate P)           | CSL Behring       | Human Coagulation Factor VIII (Wilate)        | Octapharma                  | Hematology                                     |
| Human Coagulation Factor IX (Rixubis)               | Baxalta           | N/A                                           |                             | Hematology                                     |
| Human Coagulation Factor XIII (Fibrogammin)         | CSL Behring       | N/A                                           |                             | Hematology                                     |
| Human normal immunoglobulin (Kiovig)                | Baxalta           | Human normal immunoglobulin (I.V Globulin SN) | Green Cross Corp            |                                                |
| Infliximab (remicade)                               | Schering - plough | Infliximab (remsima)                          | HikMA                       | Rheumatology, gastroenterology and Hepatology. |
| Interferon Beta-1a (Rebif)                          | Merck             | Interferon Beta-1a (Avonex)                   | Biogen                      | Neurology                                      |
|                                                     |                   | Interferon beta -1 a (recomb) (ReciGen )      | Cinnagen                    |                                                |

|                                                       |               |                                                                |              |                                                            |
|-------------------------------------------------------|---------------|----------------------------------------------------------------|--------------|------------------------------------------------------------|
|                                                       |               | Interferon beta -1 a (Cinnovex)                                | Cinnagen     |                                                            |
| Interferon Beta-1b (recomb)( Betaferon)               | Bayer         | N/A                                                            |              |                                                            |
| Idursulfase (Elaprase)                                | Takeda        | N/A                                                            |              | Gastroenterology, Neurology                                |
| Natalizumab (TYSABRI®)                                | Biogen        | N/A                                                            |              | Neurology                                                  |
| Omaliuzumab (Xolair)                                  | Novartis      | N/A                                                            |              | Dermatology                                                |
| Palivizumab (SYNAGIS)                                 | Sobi          | N/A                                                            |              | Pediatrician                                               |
| Ranibizumab (Lucentis)                                | Genentech     | N/A                                                            |              | Ophthalmology                                              |
|                                                       |               | Recombinant activated human coagulation Factor VII (AryoSeven) | AryoGen      | Hematology                                                 |
|                                                       |               | Recombinant activated coagulation Factor VII (NovoSeven)       | Novo Nordisk |                                                            |
| Recombinant antihemophilic Factor VIII (Xyntha)       | Pfizer        | Recombinant antihemophilic Factor VIII (NovoEight)             | Novo Nordisk |                                                            |
| Recombinant human-choriogonadotropin alfa (Ovitrelle) | Merck Serono  |                                                                |              | Fertility/Gynecology                                       |
| Rituximab (Mabthera )                                 | Roche         | Rituximab (zytux)                                              | Aryogen      | Rheumatology, Dermatology, oncology, nephrology, neurology |
| Somatropin (Omnitrope)                                | Sandoz        | Somatropin (Norditropin)                                       | Novo Nordisk | Pediatrician                                               |
| Trastuzumab (Herceptin)                               | Roche         | Trastuzumab (Aryotrust )                                       | Aryogen      | Oncology                                                   |
| Ustekinumab (STELARA)                                 | Janssen       | N/A                                                            |              | Gastroenterology and Hepatology.                           |
| Velaglucerase alpha (VPRIV)                           | <b>Takeda</b> |                                                                |              | Pediatrician                                               |

Last updated April 1, 2021. N/A=not approved yet. Some medicines were approved after all interviews completed.  
Source: The IqPhvC, Iraqi Ministry of Health
